# Supplementary material for: Gradient-independent Wnt signaling instructs asymmetric neurite pruning in C. elegans
Source: eLife. 2019 Dec 5;8:e50583. doi: 10.7554/eLife.50583 (PMC6894928; doi:10.7554/eLife.50583)
Supplement: Figure 1—source data 1. [file elife-50583-fig1-data1.xlsx]

## Sheet: Sheet1
Panel B		wildtype, L2	wildtype, L4		unc-13, L2	unc-13, L3-L4
	2 p-branches	16	1		12	0
	1 p-branch	13	6		20	3
	0 p-branch	10	33		7	39
Panel D	L2	L4	Image #
	2	0	1448
	2	0	1449
	2	0	1450
	1	1	1759
	1	0	1760
	2	0	1762
	2	0	1763
	1	0	1764
	1	0	1765
	2	0	1766
	1	0	1767
	2	1	1768
	2	1	1770
	1	0	1771
	1	1	1772
	2	0	1773
	1	0	1774
	2	0	1775
	2	0	1777
	2	0	1778
	2	1	1779
	2	1	1780
	2	1	1781
	1	0	1782
	1	0	353
	1	0	354
	1	1	355
	2	0	356
	1	0	360
	2	1	361
	2	0	362
	2	0	364
	2	0	130
	2	0	129
	2	1	126
	1	0	125
	2	0	132
	1	0	133
	1	1	134
	2	1	135
	1	0	136
	2	0	137
	2	0	138
