# Supplementary material for: Gradient-independent Wnt signaling instructs asymmetric neurite pruning in C. elegans
Source: eLife. 2019 Dec 5;8:e50583. doi: 10.7554/eLife.50583 (PMC6894928; doi:10.7554/eLife.50583)
Supplement: Figure 2—figure supplement 1—source data 1. [file elife-50583-fig2-figsupp1-data1.xlsx]

## Sheet: Sheet1
Panel B
		wildtype	p-branches	guidance defect	cell fate defect		total	%	wildtype	p-branches	guidance defect	cell fate defect
	wildtype	90	9	2	0		101		89.1089	8.91089	1.9802	0
	lin-44	32	38	24	6		100		32	38	24	6
	nrt-lin-44	61	11	25	6		103		59.2233	10.6796	24.2718	5.82524
	lin-17	25	83	95	48		251		9.96016	33.0677	37.8486	19.1235
	egl-20	95	5	1	0		101		94.0594	4.9505	0.990099	0
	cwn-1	86	11	5	0		101		85.1485	10.8911	3.9604	0
	mig-1	89	8	4	0		132		67.4242	6.06061	26.5152	0
	bar-1	35	4	35	387		440		7.95455	0.909091	3.18182	87.9545
	vang-1	82	15	14	1		140		58.5714	10.7143	30	0.714286
	fmi-1	90	8	42	8		108		83.3333	7.40741	1.85185	7.40741
	cam-1	93	10	2	0		104		89.4231	9.61538	0.961538	0
	unc-13	99	4	1	0		108		91.6667	3.7037	4.62963	0
