# Supplementary material for: Gradient-independent Wnt signaling instructs asymmetric neurite pruning in C. elegans
Source: eLife. 2019 Dec 5;8:e50583. doi: 10.7554/eLife.50583 (PMC6894928; doi:10.7554/eLife.50583)
Supplement: Figure 2—source data 1. [file elife-50583-fig2-data1.xlsx]

## Sheet: Sheet1
Panel D
	wild-type structure	p-neurites
wildtype	90	9
lin-44(n1792)	32	38
lin-44(miz56)	61	11
lin-17(n671)	25	83
egl-20(n585)	95	5
cwn-1(ok546)	86	11
mig-1(e1787)	89	8
bar-1(ga80)	35	4
vang-1(ok1142)	82	15
fmi-1(tm306)	90	8
cam-1(gm122)	93	10
unc-13(e450)	99	4
