# Supplementary material for: Gradient-independent Wnt signaling instructs asymmetric neurite pruning in C. elegans
Source: eLife. 2019 Dec 5;8:e50583. doi: 10.7554/eLife.50583 (PMC6894928; doi:10.7554/eLife.50583)
Supplement: Figure 3—figure supplement 1—source data 1. [file elife-50583-fig3-figsupp1-data1.xlsx]

## Sheet: Sheet1
Panel A	Ex[Prgef-1::lin-17]	L2	L4	Image #		Ex[Pkal-1::lin-17]	L2	L4	Image #
	mizEx374	1	0	411		mizEx386	1	1	34
		2	1	412			2	1	41
		1	1	413			1	0	42
		2	0	414			2	1	397
		1	0	3			2	0	398
		1	0	8			1	1	306
		2	0	9			1	0	307
		1	0	10			1	0	490
		2	0	11			1	0	593
		1	1	12			1	1	594
		1	1	13			1	1	703
		2	0	709			2	1	704
		1	1	708
						mizEx387	1	0	648
	mizEx376	2	1	196			1	0	651
		1	0	197			1	1	657
		1	0	198			2	1	658
		1	0	202			2	0	659
		2	0	206			2	2	661
		2	1	207			1	0	661
		2	0	203			1	1	663
		1	0	204			1	0	666
		2	0	205			2	0	667
		1	0	464			1	0	668
		2	1	469
		2	2	472
		1	0	474
		1	0	475
		2	1	476
Panel B		lin-17(n671)	mizEx374	mizEx376	mizEx386	mizEx387
	neurites pruned	9	13	17	9	10
	Neurites not pruned	44	5	6	7	5
