# Supplementary material for: Gradient-independent Wnt signaling instructs asymmetric neurite pruning in C. elegans
Source: eLife. 2019 Dec 5;8:e50583. doi: 10.7554/eLife.50583 (PMC6894928; doi:10.7554/eLife.50583)
Supplement: Figure 3—source data 1. [file elife-50583-fig3-data1.xlsx]

## Sheet: Sheet1
Panel C	lin-44(n1792)	L2	L4	Image #		lin-17(n671)	L2	L4	Image #		lin-44(n1792); lin-17(n671)	L2	L4	Image #
		2	2	1519			2	2	762			2	1	63
		2	2	1526			2	0	764			1	1	64
		1	1	1527			2	2	768			2	2	66
		2	2	1685			2	2	770			2	2	67
		2	1	1687			2	2	772			2	2	69
		2	1	1690			2	2	774			1	1	70
		2	2	1691			2	2	776			1	1	2764
		2	1	1693			2	2	778			1	1	2765
		1	1	1697			1	1	780			2	1	2766
		1	1	1698			1	1	781			2	2	2769
		1	1	1699			1	1	987			2	2	2770
		2	0	1701			1	1	994			2	2	2774
		2	2	1702			1	1	995			2	2	3554
		1	1	1703			1	1	996			2	2	3555
		2	1	1704			2	1	999			2	1	3557
		2	1	1705			1	1	1000			2	2	3560
		2	2	1706			2	2	1001			2	2	1
		1	1	1707			2	2	1003			2	2	2
		2	1	87			2	2	1004			2	2	3
		1	1	88			1	1	403			2	1	4
		2	2	91			1	1	406			2	2	5
		1	0	444			2	2	408			2	1	6
		2	1	445			1	1	410			1	1	30
		1	1	446			1	0	411			1	1	31
		1	1	447			2	2	413
		2	1	448			2	1	414
		2	1	460			2	1	415
		1	1	462			2	1	416
		1	1	463			1	1	417
		2	0	464			1	1	418
		1	1	466			2	1	419
		1	0	467			2	1	420
							2	2	421
Panel D		wildtype	lin-44(n1792)	lin-17(n671)	lin-44(n1792); lin-17(n671)
	neurites pruned	57	15	9	6
	Neurites not pruned	12	35	44	36
