# Supplementary material for: Gradient-independent Wnt signaling instructs asymmetric neurite pruning in C. elegans
Source: eLife. 2019 Dec 5;8:e50583. doi: 10.7554/eLife.50583 (PMC6894928; doi:10.7554/eLife.50583)
Supplement: Figure 4—source data 1. [file elife-50583-fig4-data1.xlsx]

## Sheet: Sheet1
Panel A	Ex[Pegl-20::lin-44]	L2	L4	Image #		Ex[Plin-44::egl-20]	L2	L4	Image #		Ex[Plin-44::lin-44]	L2	L4	Image #
	mizEx384	1	1	1946		mizEx349	2	0	71		mizEx248	2	0	1036
		1	1	1947			2	1	72			2	0	1038
		2	1	1949			1	1	74			2	1	1041
		2	0	1950			2	1	75			1	1	1044
		1	1	1951			2	1	77			1	1	1046
		1	1	1953			1	1	78			1	0	605
		1	0	1954			2	1	80			2	0	606
		2	1	1958			2	0	146			1	0	607
		1	1	1959			1	0	147			1	0	608
		2	2	1961			1	1	148			1	0	613
		1	1	1962			1	1	152			2	0	862
		2	1	1965			2	2	153			1	0	865
		1	1	1966			1	1	154			2	1	867
		1	1	1967			2	2	156			1	0	864
		1	1	1968
		1	0	1970		mizEx350	2	2	204		mizEx389	1	0	697
		1	1	1971			2	0	205			2	1	698
							2	2	206			2	0	699
	mizEx385	2	2	467			2	1	207			2	0	700
		1	1	470			1	1	211			1	0	701
		2	1	471			2	2	212			1	0	702
		2	2	472			1	1	216			1	0	703
		1	1	473			2	1	217			2	1	704
		1	0	474			1	0	218			1	0	706
		2	2	495			1	0	219			2	1	707
		1	1	496			2	2	461			1	0	705
		1	1	497			1	0	462
		2	0	499			1	1	463
		1	1	500			2	1	465
		1	0	501			1	0	466
		2	1	502			1	1	468
		2	2	505
		2	0	506
		1	1	507
		2	0	508
		2	2	593
		1	1	594
		2	2	596
		2	2	597
Panel B		wildtype	lin-44	mizEx384	mizEx385	mizEx349	mizEx350	mizEx248	mizEx389
	neurites pruned	57	15	7	10	9	9	16	13
	Neurites not pruned	12	35	15	23	13	15	4	3
