# Supplementary material for: Gradient-independent Wnt signaling instructs asymmetric neurite pruning in C. elegans
Source: eLife. 2019 Dec 5;8:e50583. doi: 10.7554/eLife.50583 (PMC6894928; doi:10.7554/eLife.50583)
Supplement: Figure 6—figure supplement 1—source data 1. [file elife-50583-fig6-figsupp1-data1.xlsx]

## Sheet: Sheet1
Panel B	wildtype	lin-44	nrt-lin-44
	-5.785	57.727	52.369
	-7.65	30.259	52.736
	-11.797	19.967	51.976
	-1.703	51.267	14.478
	1.898	36.112	60.53
	2.199	46.227	17.517
	-9.854	22.144	36.973
	-3.2	58.824	34.855
	0	20.838	35.243
	-22.874	13.9	10.433
	1.637	-1.97	17.683
	-7.41	9.365	50.865
	-15.824	46.774	41.361
	-2.613	28.671	28.096
	2.859	11.043	36.197
	-1.766	58.726	35.604
	7.373	46.422	30.574
	5.806		52.759
	-4.806		23.067
	0
	29.123
	20.876
	1.896
	9.926
	3.347
