# Supplementary material for: Gradient-independent Wnt signaling instructs asymmetric neurite pruning in C. elegans
Source: eLife. 2019 Dec 5;8:e50583. doi: 10.7554/eLife.50583 (PMC6894928; doi:10.7554/eLife.50583)
Supplement: Figure 6—source data 1. [file elife-50583-fig6-data1.xlsx]

## Sheet: Sheet1
Panel D	Length of asynaptic region (μm)	wildtype	lin-44(n1792)	nrt-bfp-lin-44(miz56)
		18.838	3.83	0
		24.144	3.755	3.312
		21.813	3.59	0
		26.291	0	6.233
		14.451	0	2.672
		21.412	4.618	4.296
		18.164	8.97	0
		21.122	8.13	4.848
		13.065	8.55	8.266
			4.845	2.811
			9.035	0
			0	9.008
				2.934
				2.681
				3.295
				4.744
				0
				14.19
Panel F		wildtype	lin-44(n1792)	nrt-bfp-lin-44(miz56)
	Axon overgrowth	0	81	78
	Normal length	60	13	11
	Total	60	94	89
