# Supplementary material for: Gradient-independent Wnt signaling instructs asymmetric neurite pruning in C. elegans
Source: eLife. 2019 Dec 5;8:e50583. doi: 10.7554/eLife.50583 (PMC6894928; doi:10.7554/eLife.50583)
Supplement: Figure 7—figure supplement 1—source data 1. [file elife-50583-fig7-figsupp1-data1.xlsx]

## Sheet: Sheet1
Panel E	DSH-1::GFP measurement	Image #	gfp posterior	bfp posterior	gfp background post	bfp background post	gfp anterior	bfp anterior	gfp background anteior	bfp background anterior		gfp posterior (-background)	bfp posterior (-background)	gfp anterior (-background)	bfp anterior (-background)		posterior GFP/BFP ratio	anterior GFP/BFP ratio
		wildtype
		1757	811	1570	410	917	395	922	339	702		401	653	56	220		0.614089	0.254545
		222	1616	1921	1116	1494	1163	1300	1045	994		500	427	118	306		1.17096	0.385621
		596	2721	8221	1140	2514	1601	6443	1089	2521		1581	5707	512	3922		0.277028	0.130546
		601	1525	2295	1044	1482	1007	1568	921	990		481	813	86	578		0.591636	0.148789
		602	2500	2213	1069	1259	1149	1529	992	1043		1431	954	157	486		1.5	0.323045
		1753	983	2448	611	1831	775	3521	547	1366		372	617	228	2155		0.602917	0.1058
		1757	780	1564	421	1506	407	926	341	705		359	58	66	221		6.18966	0.298643
		1592	2321	3157	1059	2194	1583	2882	898	1198		1262	963	685	1684		1.31049	0.40677
		1594	1914	3272	773	1543	1576	4176	776	1202		1141	1729	800	2974		0.659919	0.268998
		1595	1845	3282	795	1985	1064	2235	803	1749		1050	1297	261	486		0.809561	0.537037
		1598	1557	2407	816	1312	941	2639	868	1113		741	1095	73	1526		0.676712	0.0478375
		1599	3131	4051	832	1525	950	2360	744	973		2299	2526	206	1387		0.910135	0.148522
		53	1552	2397	625	1605	787	1779	674	1025		927	792	113	754		1.17045	0.149867
		43	729	1747	480	1522	526	1409	449	831		249	225	77	578		1.10667	0.133218
		44	1641	2156	596	1010	672	1536	544	1096		1045	1146	128	440		0.911867	0.290909
		49	1140	1861	621	1072	1006	2499	618	962		519	789	388	1537		0.657795	0.25244
																	1.19749	0.242662
		lin-44(n1792)
		570	1955	6575	1100	1023	1398	4127	1039	1217		855	5552	359	2910		0.153999	0.123368
		574	1464	4330	1141	1472	1198	2311	1041	1013		323	2858	157	1298		0.113016	0.120955
		575	1591	2765	1110	1752	1270	1540	1058	1032		481	1013	212	508		0.474827	0.417323
		748	1416	1610	1120	1112	1228	1319	1087	990		296	498	141	329		0.594378	0.428571
		749	1606	1230	1127	717	1341	1080	1116	752		479	513	225	328		0.933723	0.685976
		750	1266	1438	1055	922	1513	1425	1074	892		211	516	439	533		0.408915	0.82364
		742	1812	6539	1120	1998	1470	2847	1154	1773		692	4541	316	1074		0.152389	0.294227
		746	1440	1524	1246	843	1380	1217	1240	946		194	681	140	271		0.284875	0.516605
		924	2102	6562	929	794	1378	5384	1016	1261		1173	5768	362	4123		0.203363	0.0878001
		923	958	2075	760	1366	1006	2345	826	1505		198	709	180	840		0.279267	0.214286
		1712	693	2211	557	1545	594	1666	510	1101		136	666	84	565		0.204204	0.148673
		1713	839	2598	603	2312	658	1483	486	1099		236	286	172	384		0.825175	0.447917
		1716	1602	3778	826	1683	1184	3379	766	1137		776	2095	418	2242		0.370406	0.186441
		1717	1222	2440	871	1444	1193	1641	815	1126		351	996	378	515		0.35241	0.733981
		1773	1545	3627	1095	2089	1358	3555	1161	2240		450	1538	197	1315		0.292588	0.14981
																	0.376236	0.358638
		lin-17
		833	1138	2767	1003	960	1474	2667	887	1019		135	1807	587	1648		0.0747095	0.356189
		835	1247	3667	924	1710	1987	3927	959	1246		323	1957	1028	2681		0.165049	0.383439
		836	1118	2543	1037	1326	991	3018	851	1119		81	1217	140	1899		0.0665571	0.073723
		837	1714	3406	989	1449	1517	2453	1037	1183		725	1957	480	1270		0.370465	0.377953
		1472	955	2444	692	1175	1101	2483	676	1204		263	1269	425	1279		0.20725	0.332291
		571	2100	4632	815	1327	1883	4031	983	1492		1285	3305	900	2539		0.388805	0.35447
		574	970	1772	885	1234	1115	2354	827	760		85	538	288	1594		0.157993	0.180678
		577	1346	1732	887	1172	977	998	885	936		459	560	92	62		0.819643	1.48387
		578	1417	3036	807	970	982	1615	920	1125		610	2066	62	490		0.295257	0.126531
																	0.282859	0.407683
		nrt-bfp-lin-44 (miz56)
		209	1335	2301	928	1001	956	1507	881	844		407	1300	75	663		0.313077	0.113122
		73	1570	2489	772	1513	1522	3641	781	1346		798	976	741	2295		0.817623	0.322876
		74	1497	1718	818	1377	878	1289	721	1044		679	341	157	245		1.9912	0.640816
		78	5878	2856	2900	1022	1731	6045	893	1719		2978	1834	838	4326		1.62377	0.193712
		81	1595	2036	943	1618	1144	1270	888	989		652	418	256	281		1.55981	0.911032
		210	2085	6331	938	1744	986	2270	928	1188		1147	4587	58	1082		0.250055	0.0536044
		282	1328	1874	1030	1291	1074	1395	1010	1080		298	583	64	315		0.511149	0.203175
		286	1418	2569	1053	1482	1195	1464	995	905		365	1087	200	559		0.335787	0.357782
		105	4320	4626	876	1987	1279	3092	857	1121		3444	2639	422	1971		1.30504	0.214105
		320	2567	2287	1306	1633	1826	2431	1135	2119		1261	654	691	312		1.92813	2.21474
																	1.06356	0.522497
