# Supplementary material for: Gradient-independent Wnt signaling instructs asymmetric neurite pruning in C. elegans
Source: eLife. 2019 Dec 5;8:e50583. doi: 10.7554/eLife.50583 (PMC6894928; doi:10.7554/eLife.50583)
Supplement: Figure 7—source data 1. [file elife-50583-fig7-data1.xlsx]

## Sheet: Sheet1
Panel D	LIN-17::GFP measurement	Image #	gfp posterior	bfp posterior	gfp background post	bfp background post	gfp anterior	bfp anterior	gfp background anteior	bfp background anterior		gfp posterior (-background)	bfp posterior (-background)	gfp anterior (-background)	bfp anterior (-background)		posterior GFP/BFP ratio	anterior GFP/BFP ratio
		wildtype
		1939	2025	1198	896	833	1004	986	865	592		1129	365	139	394		3.09315	0.352792
		2021	1534	1724	1027	785	911	1271	905	829		507	939	6	442		0.539936	0.0135747
		2022	2223	1328	1109	752	1085	1443	992	906		1114	576	93	537		1.93403	0.173184
		2023	2203	1351	989	1024	1022	1424	930	856		1214	327	92	568		3.71254	0.161972
		2024	3680	1699	1147	618	1180	1794	1025	689		2533	1081	155	1105		2.3432	0.140271
		2025	1913	1016	911	631	1034	1128	916	820		1002	385	118	308		2.6026	0.383117
		2026	1879	996	943	876	1074	1049	1038	707		936	120	36	342		7.8	0.105263
		2028	2412	2018	1048	1707	1018	1558	976	808		1364	311	42	750		4.38585	0.056
		2030	3102	1548	1043	832	955	1301	837	551		2059	716	118	750		2.8757	0.157333
		2031	2130	1235	1119	690	943	853	873	608		1011	545	70	245		1.85505	0.285714
		2032	2454	2390	991	1148	964	1301	935	842		1463	1242	29	459		1.17794	0.0631808
		2033	4369	1593	1148	1468	1146	1808	955	842		3221	125	191	966		25.768	0.197723
		2034	2462	1181	1032	868	1259	1074	982	852		1430	313	277	222		4.56869	1.24775
		2038	2118	1330	935	946	966	1291	877	679		1183	384	89	612		3.08073	0.145425
		2039	1977	2257	1030	801	1102	3868	960	1078		947	1456	142	2790		0.650412	0.0508961
		2040	1128	1544	954	1075	1112	1567	962	884		174	469	150	683		0.371002	0.219619
		2041	1469	1111	1021	661	894	897	881	503		448	450	13	394		0.995556	0.0329949
		2045	1931	1185	970	1010	1076	1095	1025	675		961	175	51	420		5.49143	0.121429
		2046	2186	1205	1056	1061	1854	1216	1053	905		1130	144	801	311		7.84722	2.57556
																Avg.	4.26805	0.341253
		lin-44(n1792)
		1271	2565	3202	1015	1563	1678	2003	986	1059		1550	1639	692	944		0.945699	0.733051
		1318	2878	3483	1068	1289	2730	3430	1052	1841		1810	2194	1678	1589		0.824977	1.05601
		1320	1994	6441	1082	1470	1539	1343	950	635		912	4971	589	708		0.183464	0.831921
		1322	1784	1914	993	762	1286	1039	882	681		791	1152	404	358		0.686632	1.12849
		1324	1282	2523	886	1011	1034	2089	928	977		396	1512	106	1112		0.261905	0.0953237
		1429	1635	1387	923	1021	1730	1208	1143	888		712	366	587	320		1.94536	1.83438
		1432	2112	2713	1050	730	1776	1717	944	841		1062	1983	832	876		0.535552	0.949772
		1434	2250	2322	1046	1775	1694	1185	958	784		1204	547	736	401		2.2011	1.83541
		1435	2169	1826	995	757	1199	1387	944	853		1174	1069	255	534		1.09822	0.477528
		1437	1481	2284	853	1803	1334	1890	899	1491		628	481	435	399		1.30561	1.09023
		1438	1098	1308	844	1152	962	1135	927	701		254	156	35	434		1.62821	0.0806452
		1763	1041	1054	866	675	1050	669	832	589		175	379	218	80		0.461741	2.725
		1764	1346	1418	841	1149	1391	1242	903	852		505	269	488	390		1.87732	1.25128
		1765	1456	2239	859	991	1886	2681	886	906		597	1248	1000	1775		0.478365	0.56338
		1767	1497	2248	938	1149	1782	1860	909	1180		559	1099	873	680		0.508644	1.28382
		1768	2665	2833	889	898	1832	2203	921	1062		1776	1935	911	1141		0.917829	0.798422
																Avg.	0.991289	1.04592
		nrt-bfp-lin-44 (miz56)
		277	20174	5349	1031	1980	4320	6510	1109	1269		19143	3369	3211	5241		5.6821	0.612669
		278	1170	1472	754	1055	895	954	734	740		416	417	161	214		0.997602	0.752336
		280	16974	8309	1154	847	2373	3874	1012	1671		15820	7462	1361	2203		2.12008	0.617794
		309	10020	4315	1357	1219	2874	4808	1031	1203		8663	3096	1843	3605		2.79813	0.511234
		310	25757	4690	1488	877	6853	12735	1218	2660		24269	3813	5635	10075		6.3648	0.559305
		311	2070	1627	1062	1383	1275	1038	1105	674		1008	244	170	364		4.13115	0.467033
		312	5323	2581	1109	1637	1279	1020	999	790		4214	944	280	230		4.46398	1.21739
		313	13609	3985	1530	839	2303	3030	1119	1194		12079	3146	1184	1836		3.83948	0.64488
		314	13345	3703	1680	893	2948	3307	1180	1174		11665	2810	1768	2133		4.15125	0.82888
		316	20865	5118	1453	1422	3140	4540	1194	1466		19412	3696	1946	3074		5.25216	0.633051
		317	2376	3449	1116	1377	2367	2840	1102	926		1260	2072	1265	1914		0.608108	0.66092
		71	2121	1945	1032	916	1046	1528	892	650		1089	1029	154	878		1.05831	0.175399
		526	20668	7766	1494	1259	1068	1755	897	926		19174	6507	171	829		2.94667	0.206273
		527	1803	2185	862	1112	1256	1893	979	1000		941	1073	277	893		0.87698	0.31019
		528	6316	3005	1047	1125	1425	2339	936	1005		5269	1880	489	1334		2.80266	0.366567
		530	4426	3360	1015	1499	1555	5252	985	1396		3411	1861	570	3856		1.83289	0.147822
		532	4445	2636	1089	1722	1078	1874	858	883		3356	914	220	991		3.67177	0.221998
																Avg.	3.15283	0.525514
